# Supplementary material for: Impact of the 2011 off the Pacific coast of Tohoku earthquake on a deep-seabenthic ecosystem: evidence from living and dead benthic foraminifera on the landward slope of the Japan Trench
Source: Copernicus journal article supplement (doi:10.5194/bg-2018-237), 2018-06-18
Supplement: Supplementary file [file bg-2018-237-RC1-supplement.pdf]

I would like to congratulate the authors on their work. This was a very interesting manuscript and it's always exciting to see the diversity of tsunami foraminiferal signatures in the sedimentary record explored, particularly from a deep-sea setting.

I think this manuscript needs moderate amendments before publication. My main concerns are largely cosmetic and relate to further detail (substantially more in some areas), clarification and explanation of various elements. I would also advise the use of more cautious language to describe your results as they're based on some relatively low sample sizes in some areas.

#### **BGD questions:**

1. Does the paper address relevant scientific questions within the scope of BG? **Yes**
2. Does the paper present novel concepts, ideas, tools, or data? **Yes**
3. Are substantial conclusions reached? **Yes (with additional detail)**
4. Are the scientific methods and assumptions valid and clearly outlined? **Mostly**
5. Are the results sufficient to support the interpretations and conclusions? **Mostly**
6. Is the description of experiments and calculations sufficiently complete and precise to allow their reproduction by fellow scientists (traceability of results)? **Yes**
7. Do the authors give proper credit to related work and clearly indicate their own new/original contribution? **Yes**
8. Does the title clearly reflect the contents of the paper? **Yes but needs cutting back**
9. Does the abstract provide a concise and complete summary? **Yes**
10. Is the overall presentation well-structured and clear? **Yes**
11. Is the language fluent and precise? **Needs work**
12. Are mathematical formulae, symbols, abbreviations, and units correctly defined and used? **Yes**
13. Should any parts of the paper (text, formulae, figures, tables) be clarified, reduced, combined, or eliminated? **Some clarification is needed in areas of the text.**
14. Are the number and quality of references appropriate? **Yes**
15. Is the amount and quality of supplementary material appropriate? **Further supplementary material would help this paper and future researchers.**

#### **Scientific questions:**

- Pg 3 Lines 11-13: Did you complete any sedimentological analyses or recordings of your cores? Any grain size or stratigraphic record that you can link your foraminiferal assemblages to? Or sediment coloration (e.g. Munsell colours)? Perhaps an image of the core? This would be particularly useful in highlighting your allochthonous sediments and where you mention the deposition of diatomaceous ooze.
- Pg 3 Line 17: What temperature did you oven dry the samples at? This can affect the preservation of agglutinated specimens.
- Pg 3 Line 40: Why a 106  $\mu\text{m}$  sieve for foraminiferal analyses? That sieve size is an unusual gauge and you'd already sieved at 63  $\mu\text{m}$  which is standard. Given the depth of your samples (I've found them as small as 30  $\mu\text{m}$  from a nearby sample), a 106  $\mu\text{m}$  sieve would have caused the loss of many, small heterotrophic species.
- Pg 4 Section 3.1: Could you explain the significance of measuring mud and water content stability/lack of stability?

- Pg 4 Section 3.3: Given the inherent difficulties in foram taxonomy and their potential benefit in being identified to species level in biogeographical studies, it would be good to have a plate of the identified species either as a figure or as a supplementary file/appendix to help future researchers.
- Pg 4 Section 3.3: How many species of foraminifera both live and total were identified?
- Pg 5 Section 3.3: I would like to see a figure that illustrates the clustering discussed, particularly showing the sub-clustering of the two main assemblages. This can be either as a figure in the main manuscript or as a supplement/appendix. Given the low raw numbers in some sections of core I'm not sure such extensive subdivision is necessary, and I think their subdivision confuses the story you're trying to tell.
- Pg 6, section 4.2: You link your foram assemblages to 3 sediment facies that you never explained in your results. What facies? You cannot discuss these without establishing them in the first place. Just saying they exist and marking them on a figure is not enough.
- Pg 6, Line 14: Why would diatom blooms accelerate  $^{134}\text{C}$ s deposition?
- Pg 6, Lines 19-21: You talk about diatoms and radiolarians in your discussion but they're not mentioned in your methodology or results. How have you quantified them and their significance? Why would diatom blooms accelerate  $^{134}\text{C}$ s deposition? Why mention the radiolarians?
- Pg 7, Line 10: "High species diversity" is relative given your small sample size, actual diversity values would be clearer here.
- Pg 8, Section 5: Despite mentioning it in both your abstract and your conclusions nowhere do you report on your allochthonous foraminifera that are deposited between your pre-earthquake and post-earthquake/opportunistic form assemblage. Or did you mean for your downslope transported foraminifera to be your allochthonous assemblage? In any case, it is not clear in your results/discussion.

### Technical comments:

- The title's wording is very long, contains unnecessary detail for a title and is a bit awkward. I would recommend altering to something like "Impact of the 2011 Tohoku-oki Earthquake on the deep-sea benthos: evidence from foraminifera of the Japan Trench slope". Even "Deep-sea benthic foraminiferal evidence of the 2011 Tohoku-oki Earthquake impact on the Japan Trench" as you only really mention the significance of the downward slope location of your samples in one sentence.
- The English needs correction and tightening up. Many sentences are too long and should be subdivided and the grammar needs a lot of work.
- "The 2011 off the Pacific coast of Tohoku earthquake" is a very long-winded name for an event that is well-known and greatly established both in the media and in scientific literature. It should just be referred to as the "2011 Tohoku-oki earthquake".
- Figure 10: Why is there a dotted diagonal line above "Reophax Recurvoides, Silicosigmoilina" on the right-side Y-axis?
- Pg 7, Line 3 (and elsewhere throughout the manuscript): You cannot start a sentence with an abbreviated species name, it needs to be written in full.
